# Supplementary material for: Urbanization and traffic related exposures as risk factors for Schizophrenia
Source: PubMed Central journal article supplement (PMC1386659; doi:10.1186/1471-244x-6-2), 2006-01-19

# Degree of urbanization

- Capital
- Capital suburb
- Provincial city
- Provincial town
- Rural area

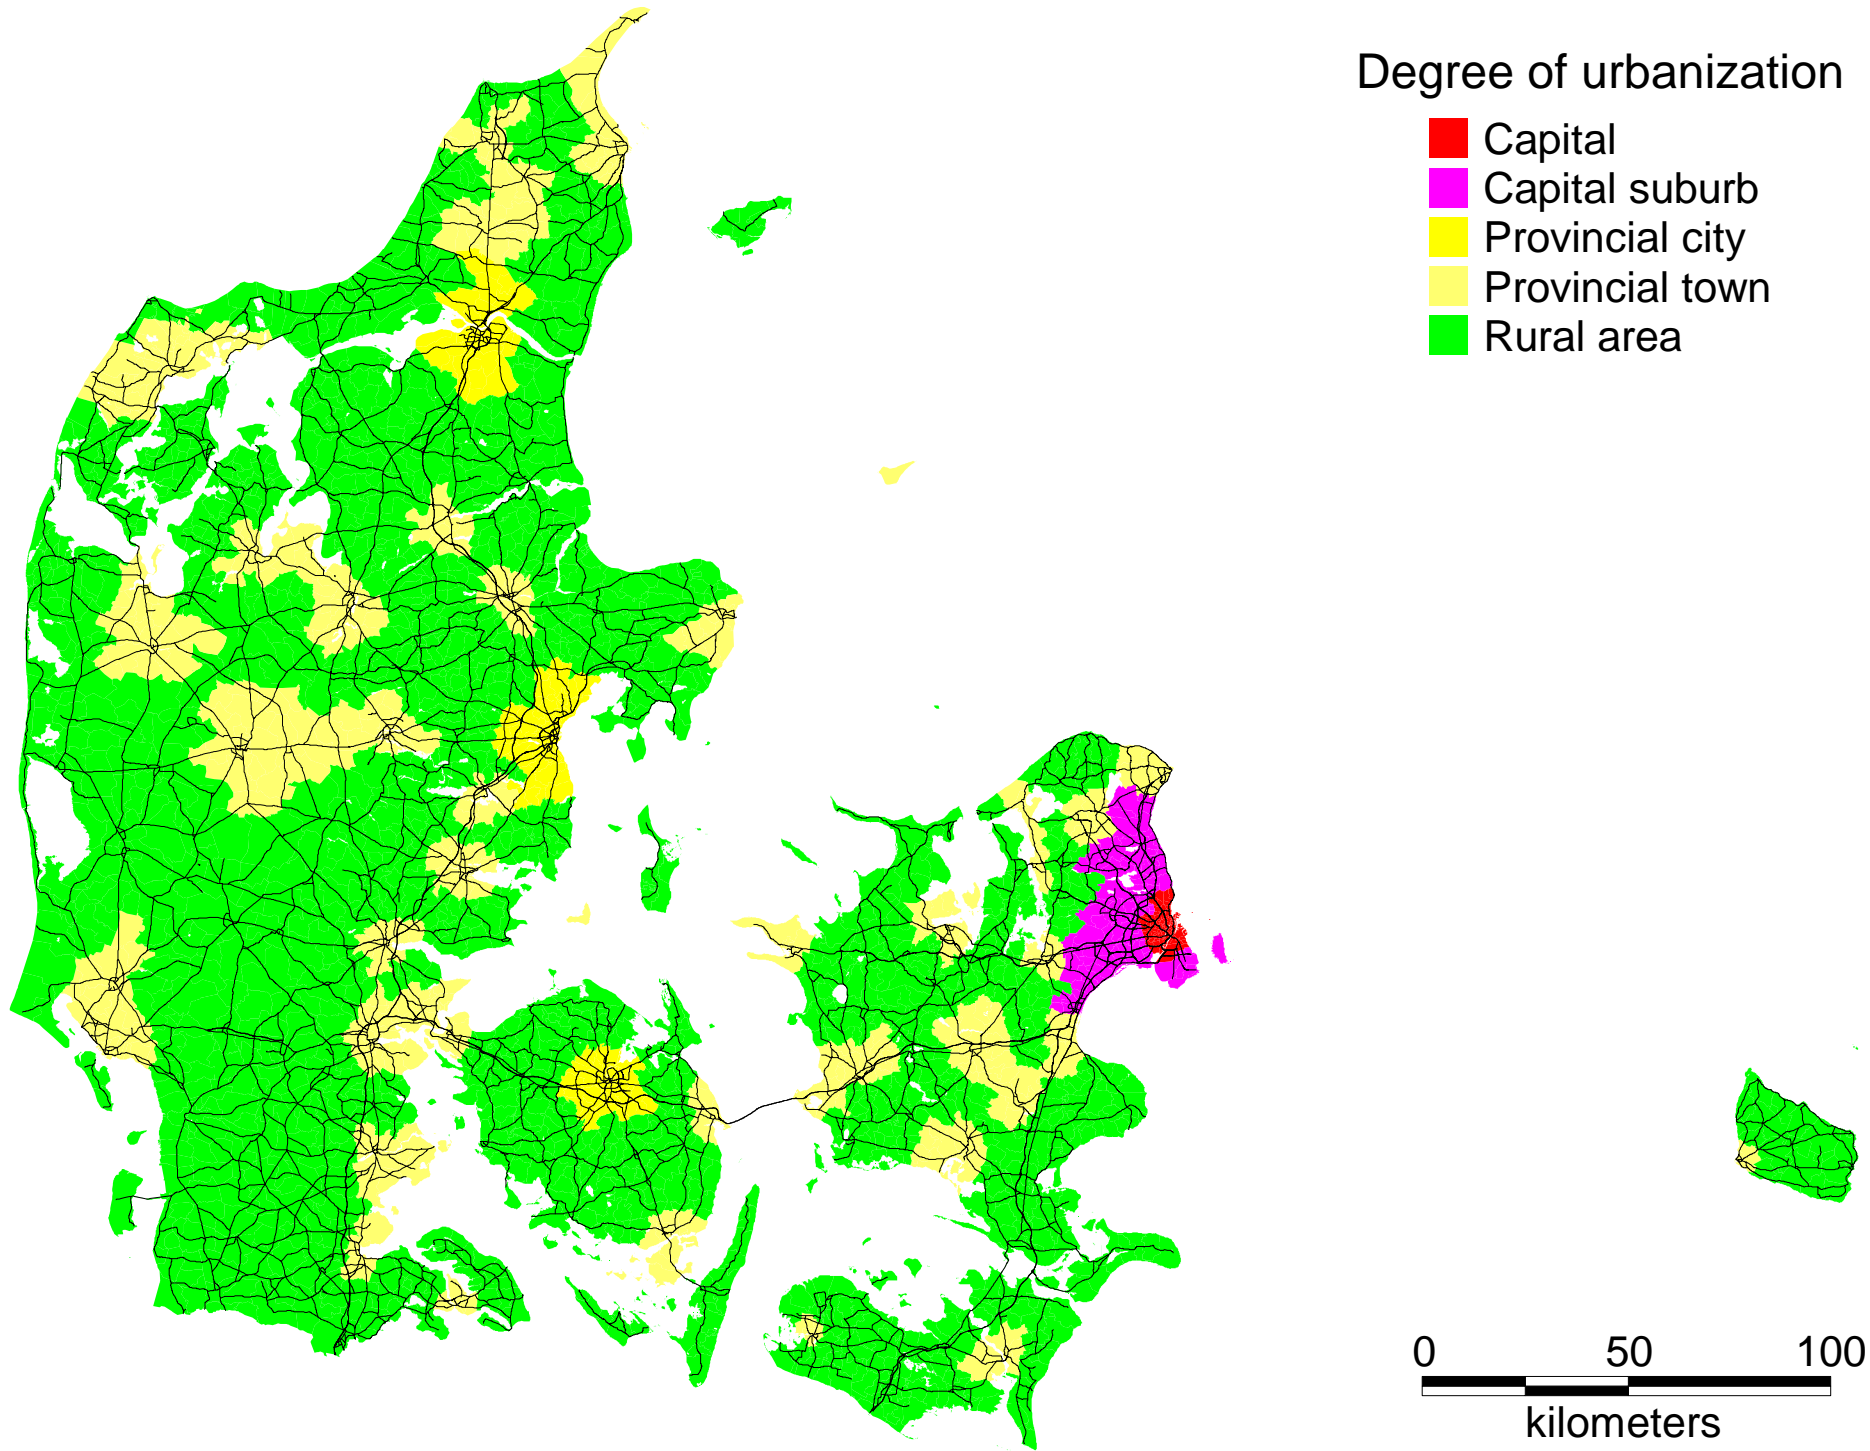

Supplement: 1471-244X-6-2-S1.pdf [file 1471-244X-6-2-S1.pdf]
