# Supplementary material for: Urbanization and traffic related exposures as risk factors for Schizophrenia
Source: PubMed Central journal article supplement (PMC1386659; doi:10.1186/1471-244x-6-2), 2006-01-19

# Distance to nearest major road

- 0 - 250 m
- 250 - 1000 m
- > 1000 m

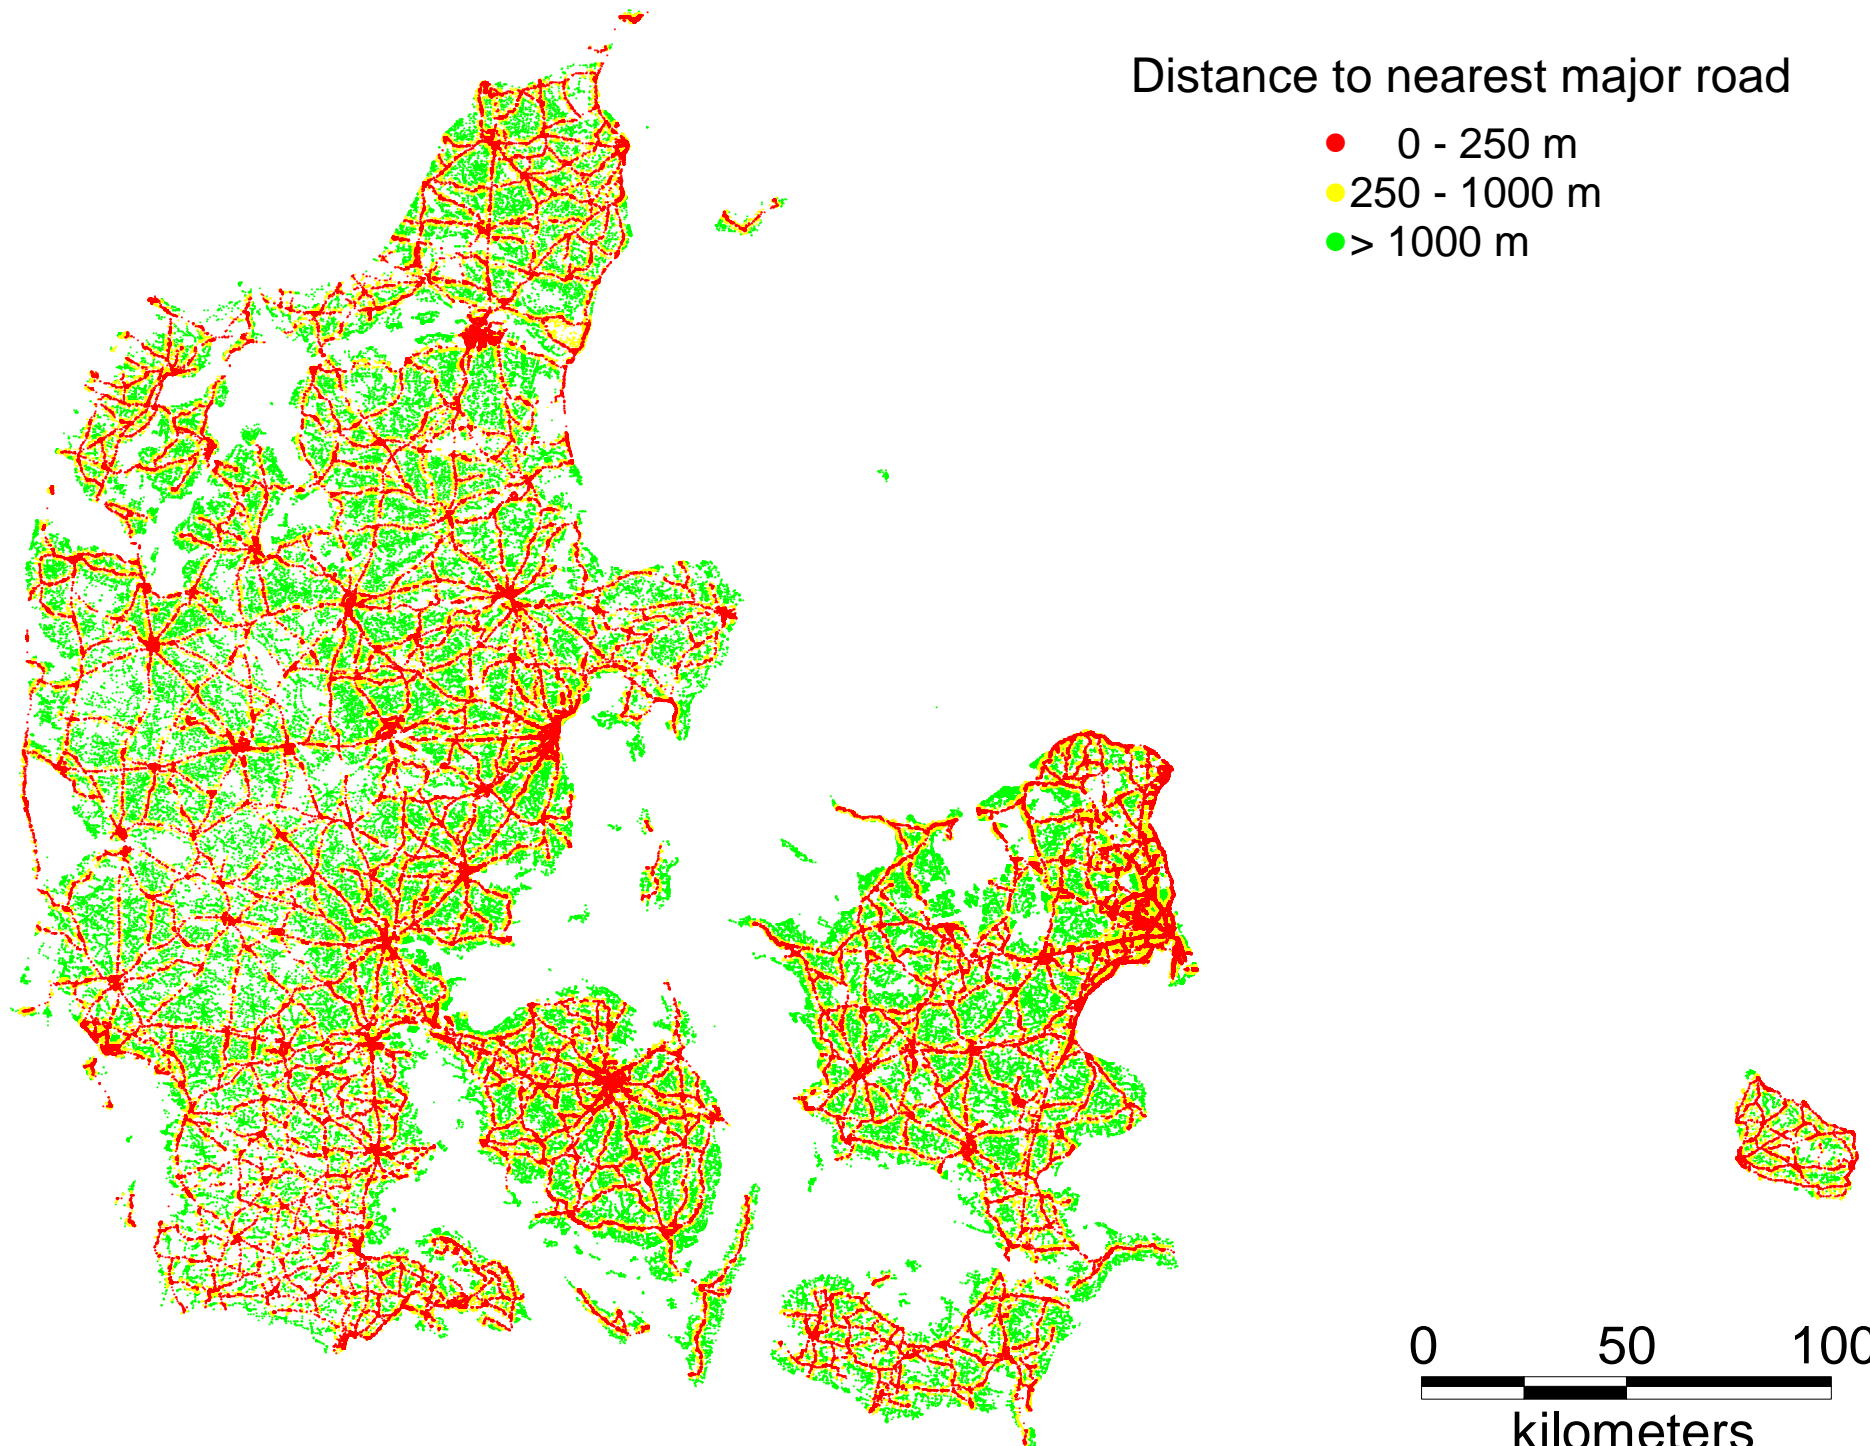

Supplement: 1471-244X-6-2-S2.pdf [file 1471-244X-6-2-S2.pdf]
